# Supplementary material
Source: publisher figshare collection journal article supplement (https://frontiersin.figshare.com/ndownloader/files/31795238)

**Figure S1:** Heatmap for the distribution of linkage disequilibrium (LD) across the genome in the VIR-LTT panel estimated as  $r^2$  using 5,813 SNP markers. The number of SNP markers for each chromosome and average adjacent marker LD for each chromosome are included.

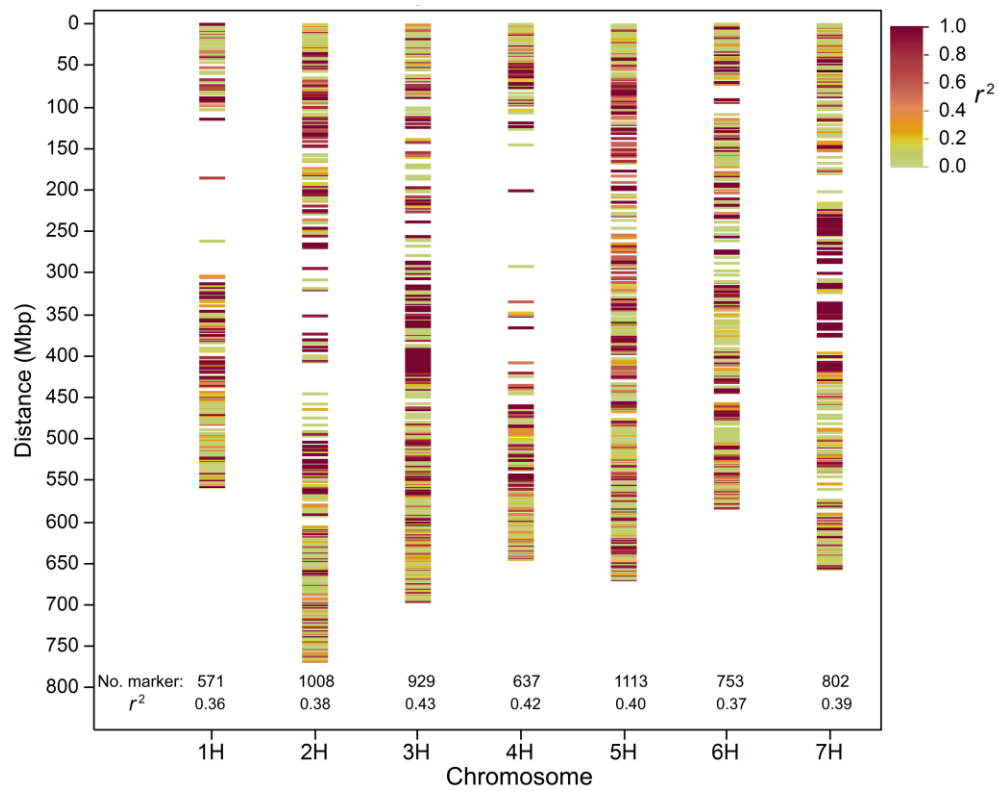

**Figure S2:** Heatmap matrix displaying the genomic additive relationship matrix for the 267 barley accessions of the VIR-LTT panel based on 5,813 SNP markers.

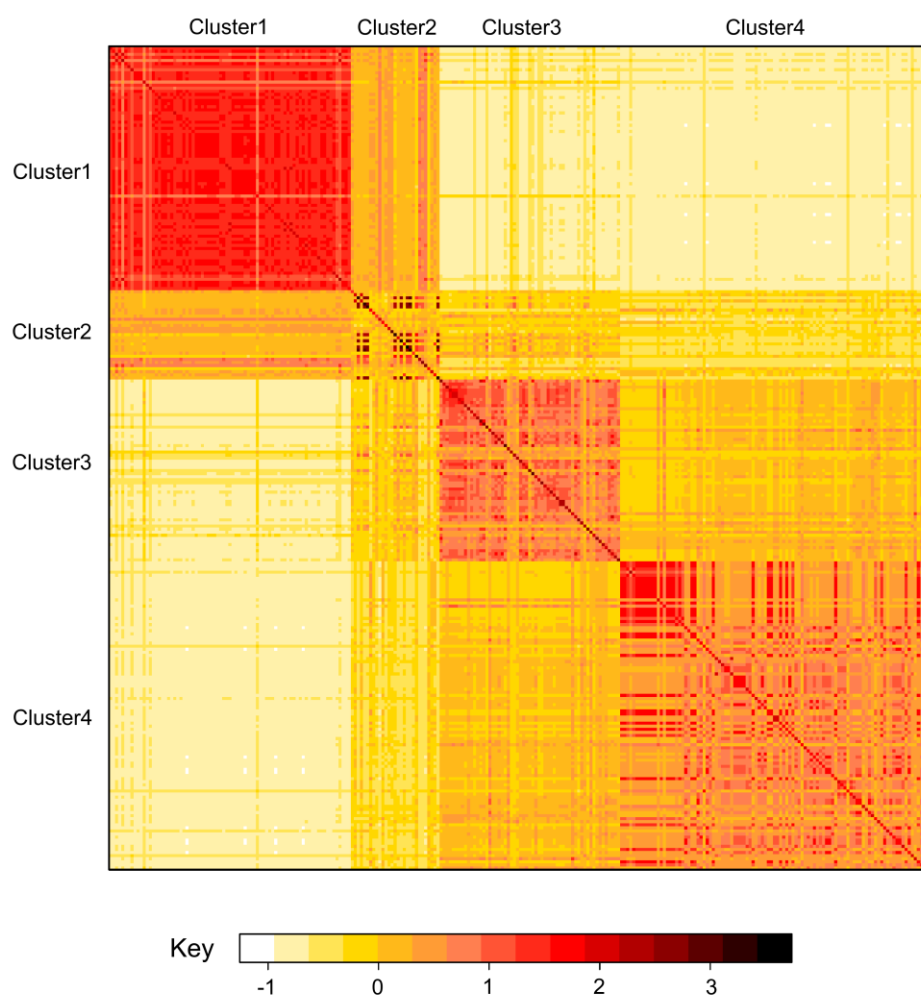

Supplement: Supplementary file [file 31795238]
